# Supplementary material for: A small secreted protein from Zymoseptoria tritici interacts with a wheat E3 ubiquitin ligase to promote disease
Source: PubMed Central journal article supplement (PMC7853600; doi:10.1093/jxb/eraa489), 2020-10-23
Supplement: eraa489_suppl_supplementary_figure.pdf [file eraa489_suppl_supplementary_figure.pdf]

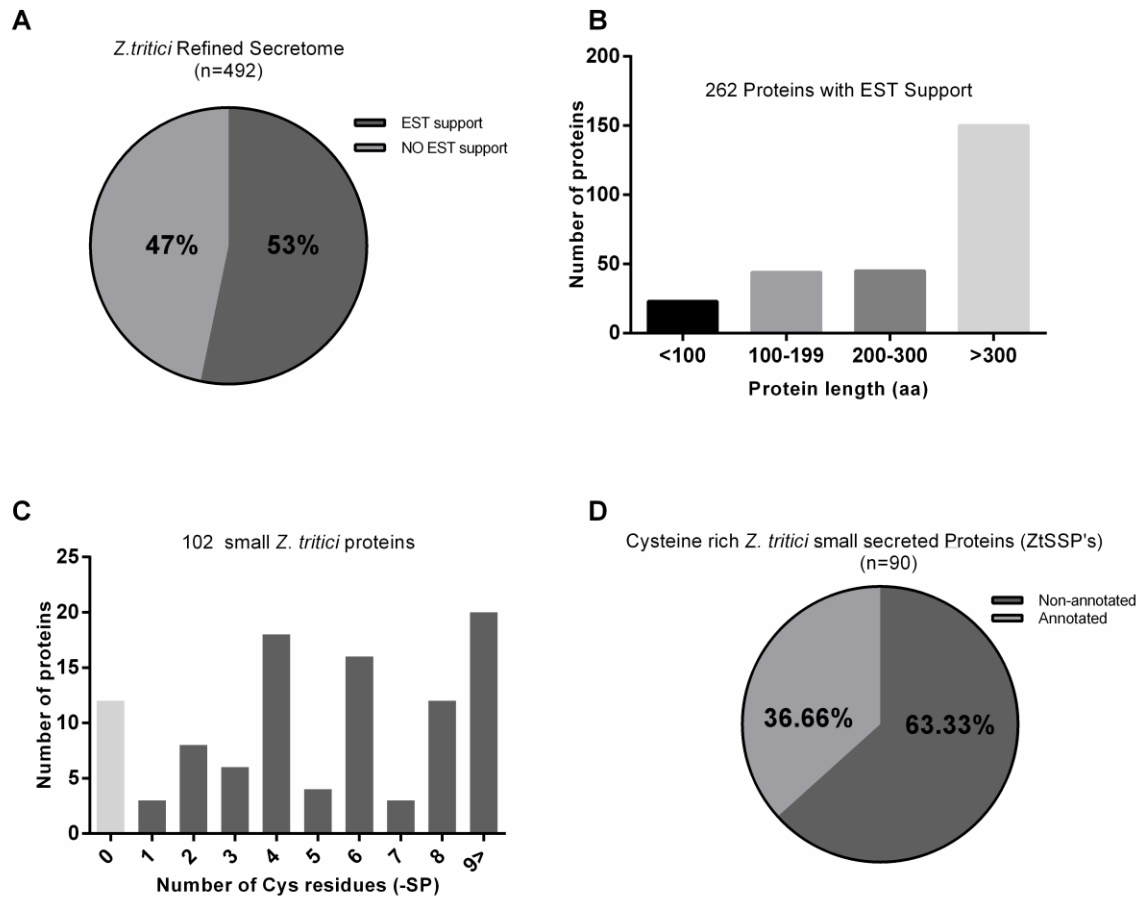

**Fig. S1** *In silico* selection of non-annotated small secreted proteins (ZtSSP) of *Z. tritici*. (a) Selection of small proteins, 492 proteins encoded by the *Z. tritici* genome with EST support (do Amaral et al., 2012). (b) Proteins were classified based on their size and proteins with 50-315 amino acid length were selected. (c) Numbers of cysteine residues in the selected mature proteins after removing signal peptide. (d) Proteins were annotated based on the presence of conserved functional domain.

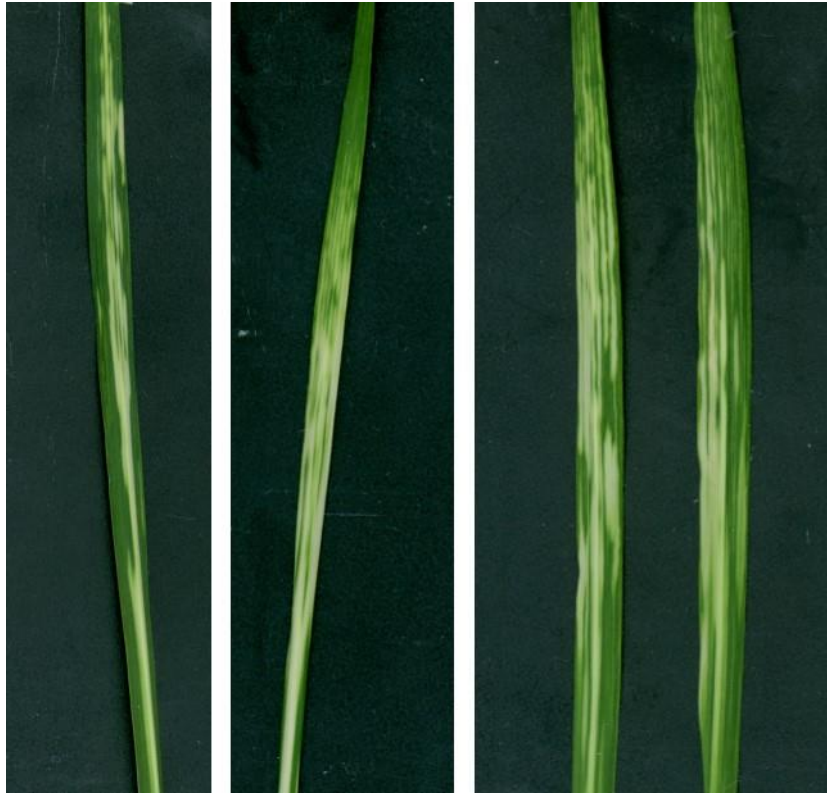

**Fig. S2** Barley Stripe Mosaic Virus (BSMV) mediated gene silencing (VIGS) of *phytoene desaturase* (*PDS*) gene in wheat. Image of bleached *PDS* silenced fourth leaf at 10-14 days post inoculation with BSMV.

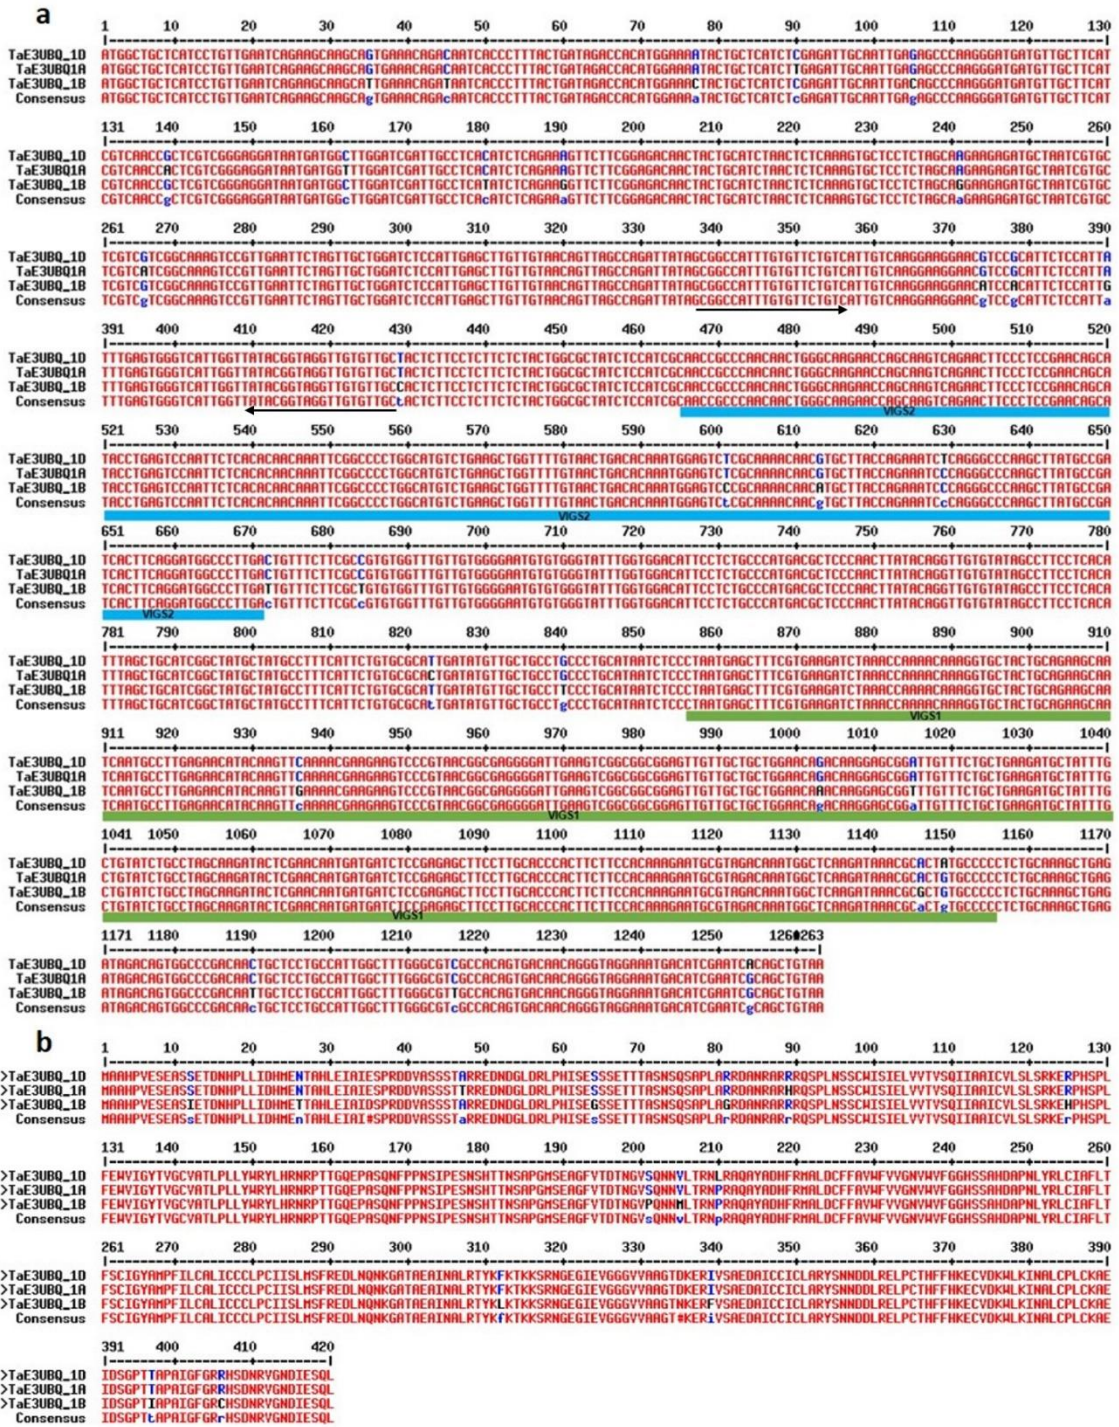

**Fig. S3** Three homologues of *TaE3UBQ* are of high similarity. a) Nucleotide sequence alignments and (b) Amino acid sequences of three different homologues of *TaE3UBQ* gene were obtained from Ensembl plant database. The three homologues are located on chromosomes 1A, 1B and 1D, respectively, base variations indicated with blue. The sequence alignment was performed using *MultAlin* (Corpet, 1998). Regions targeted by VIGS1 and VIGS2 constructs are highlighted below by a solid blue and green line, respectively. Region targeted by conserved qPCR primers are shown by black arrows.

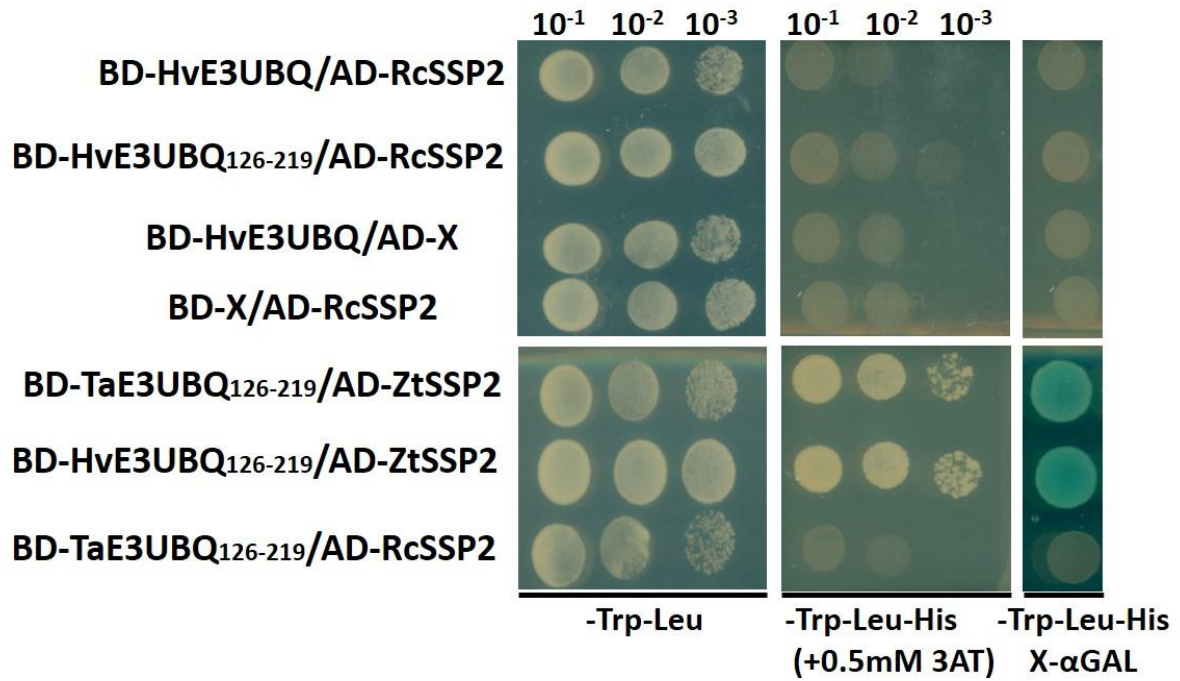

**Fig. S4** Yeast two hybrid assay to test the interaction of *Ramularia Collo-cygni* homologue of ZtSSP2; RcSSP2 with Barley homologue of TaE3UBQ; HvE3UBQ. Yeast transformed with HvE3UBQ, HvE3UBQ<sub>126-219</sub> and RcSSP2 cloned in the Gal4 bait and prey vectors. Yeast were grown for 4-5 days under selective Trp/Leu/His drop out medium in presence of 0.3mM 3-amino-1,2,4-triazole (3-AT) and X-α-gal medium or a non-selective Trp/Leu drop out medium (-TL) conditions. BD represents Binding domain & AD, activating domain. Experiment was repeated three times independently with three replicates per independent experiment.

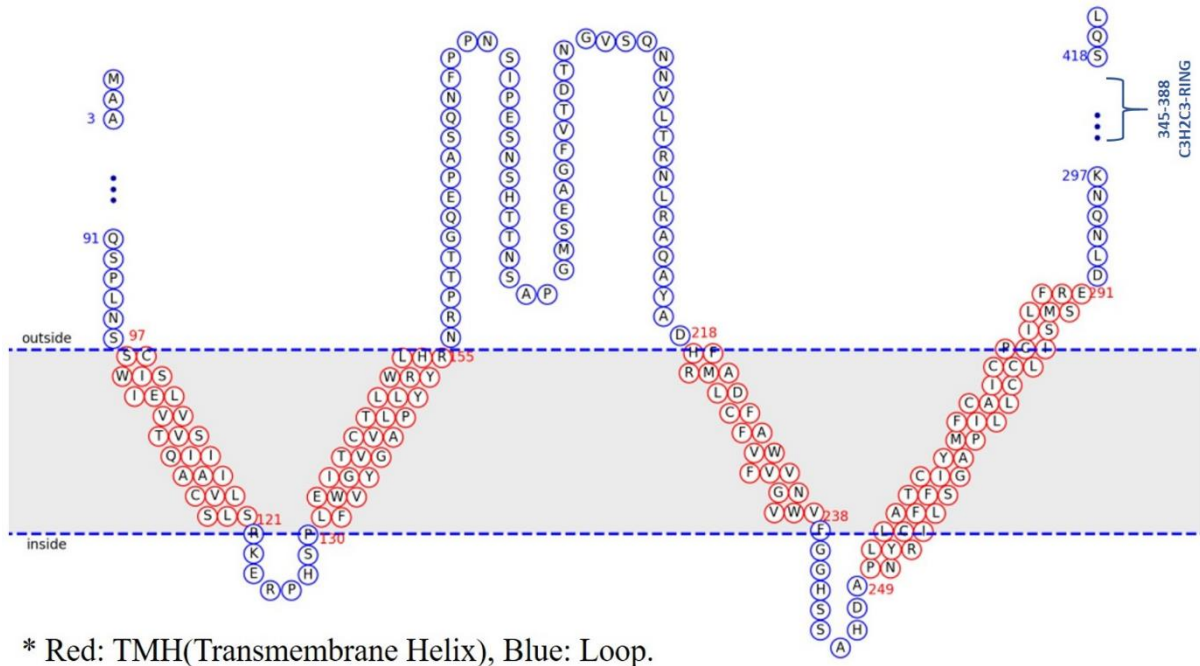

**Fig. S5** TaE3UBQ protein topology illustration using MemBrain 3.1 (Yin *et al.*, 2017). The protein sequence of TaE3UBQ shows transmembrane helix domains, an extracellular loop (155-218) and intracellular regions within the protein structure. The C3H2C3-ring is shown.

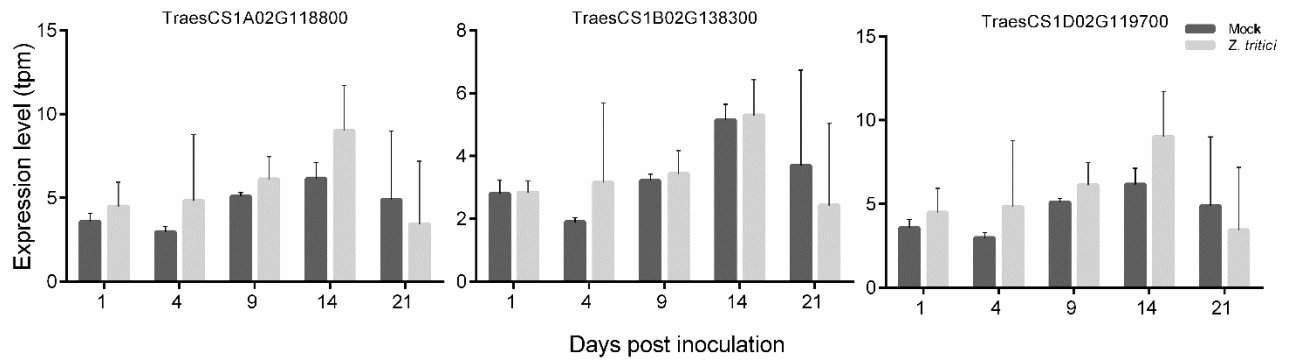

**Fig. S6** Expression profiles of wheat E3 ubiquitin ligase homeologs during *Z. tritici* infection. Normalised expression data (in transcript per million (TPM)) retrieved from expVIP (Borrill *et al.*, 2016) for all three TaE3UBQ homeologs following *Z. tritici* infection and mock treatment at 1, 4, 9, 14 and 21 days post inoculation (dpi).

**Table S1.** List of putative candidate effector proteins of *Z. tritici* (ZtSSPs).

Gene ID corresponds to JGI gene ID, Gene annotations were obtained from JGI database and blast search performed with NCBI BlastP. Functional annotation was performed using NCBI CDD database. EffectorP 1.0 and ApoplasticP 1.0 was used to predict if small, secreted proteins are predicted effectors and their localisation respectively: '+' and '-' indicates positive and negative prediction. Candidates that matched Kettles *et al.*, 2017 are referred as Zt.

| Codes   | Gene ID<br>JGI       | Size<br>(aminoacids) | Gene functional<br>annotation (CDD<br>database) | EffectorP 2.0<br>Prediction | ApoplasticP<br>Prediction |
|---------|----------------------|----------------------|-------------------------------------------------|-----------------------------|---------------------------|
| ZtSSP1  | <i>Mycgr3G73448</i>  | 180                  | Hypothetical                                    | +                           | -                         |
| ZtSSP2  | <i>Mycgr3G105265</i> | 200                  | Hypothetical                                    | -                           | +                         |
| ZtSSP3  | <i>Mycgr3G81079</i>  | 258                  | Hypothetical                                    | +                           | -                         |
| ZtSSP4  | <i>Mycgr3G103091</i> | 83                   | Hypothetical                                    | -                           | +                         |
| ZtSSP5  | <i>Mycgr3G99161</i>  | 165                  | Hypothetical                                    | +                           | +                         |
| ZtSSP6  | <i>Mycgr3G100649</i> | 76                   | Hypothetical                                    | +                           | +                         |
| ZtSSP7  | <i>Mycgr3G102617</i> | 158                  | Hypothetical                                    | +                           | +                         |
| ZtSSP8  | <i>Mycgr3G103900</i> | 130                  | Hypothetical                                    | +                           | +                         |
| ZtSSP9  | <i>Mycgr3G104000</i> | 181                  | Hypothetical                                    | +                           | -                         |
| ZtSSP10 | <i>Mycgr3G104404</i> | 180                  | Hypothetical                                    | -                           | +                         |
| ZtSSP11 | <i>Mycgr3G104444</i> | 80                   | Hypothetical                                    | +                           | +                         |
| ZtSSP12 | <i>Mycgr3G104794</i> | 158                  | Hypothetical                                    | +                           | -                         |
| ZtSSP13 | <i>Mycgr3G105182</i> | 144                  | Hypothetical                                    | +                           | +                         |
| ZtSSP14 | <i>Mycgr3G105223</i> | 189                  | Hypothetical                                    | +                           | +                         |
| ZtSSP15 | <i>Mycgr3G105659</i> | 183                  | Hypothetical                                    | -                           | -                         |
| ZtSSP16 | <i>Mycgr3G105826</i> | 99                   | Hypothetical                                    | +                           | +                         |
| ZtSSP17 | <i>Mycgr3G105896</i> | 193                  | Hypothetical                                    | +                           | -                         |
| ZtSSP18 | <i>Mycgr3G106445</i> | 120                  | Hypothetical                                    | +                           | +                         |
| ZtSSP19 | <i>Mycgr3G108482</i> | 109                  | Hypothetical                                    | +                           | +                         |
| ZtSSP20 | <i>Mycgr3G110220</i> | 132                  | Hypothetical                                    | +                           | +                         |
| ZtSSP21 | <i>Mycgr3G111008</i> | 220                  | Hypothetical                                    | -                           | +                         |
| ZtSSP22 | <i>Mycgr3G111382</i> | 191                  | Hypothetical                                    | -                           | +                         |
| ZtSSP23 | <i>Mycgr3G68477</i>  | 315                  | Hypothetical                                    | -                           | +                         |
| ZtSSP24 | <i>Mycgr3G90001</i>  | 287                  | Hypothetical                                    | -                           | +                         |
| ZtSSP25 | <i>Mycgr3G101652</i> | 77                   | Hypothetical                                    | +                           | +                         |
| Zt-4    | <i>Mycgr3G104697</i> | 150                  | Hypothetical                                    | -                           | +                         |
| Zt-10   | <i>Mycgr3G111505</i> | 198                  | Hypothetical                                    | -                           | +                         |
| Zt-14   | <i>Mycgr3G107286</i> | 117                  | Hypothetical                                    | +                           | +                         |
| ZtSSP26 | <i>Mycgr3G102996</i> | 164                  | Hypothetical                                    | +                           | +                         |
| ZtSSP27 | <i>Mycgr3G103254</i> | 101                  | Hypothetical                                    | +                           | +                         |
| ZtSSP28 | <i>Mycgr3G104758</i> | 119                  | Hypothetical                                    | +                           | +                         |
| ZtSSP29 | <i>Mycgr3G104867</i> | 171                  | Hypothetical                                    | -                           | +                         |
| ZtSSP30 | <i>Mycgr3G105677</i> | 199                  | Hypothetical                                    | +                           | +                         |
| ZtSSP31 | <i>Mycgr3G106106</i> | 157                  | Hypothetical                                    | -                           | +                         |
| ZtSSP32 | <i>Mycgr3G106345</i> | 164                  | Hypothetical                                    | -                           | +                         |
| ZtSSP33 | <i>Mycgr3G106502</i> | 90                   | Hypothetical                                    | +                           | +                         |
| ZtSSP34 | <i>Mycgr3G107824</i> | 137                  | Hypothetical                                    | -                           | +                         |
| ZtSSP35 | <i>Mycgr3G108329</i> | 193                  | Hypothetical                                    | +                           | -                         |
| ZtSSP36 | <i>Mycgr3G108877</i> | 112                  | Hypothetical                                    | +                           | +                         |
| ZtSSP37 | <i>Mycgr3G110052</i> | 180                  | Hypothetical                                    | +                           | -                         |
| ZtSSP38 | <i>Mycgr3G110144</i> | 222                  | Hypothetical                                    | -                           | +                         |
| ZtSSP39 | <i>Mycgr3G41315</i>  | 196                  | Hypothetical                                    | -                           | -                         |
| ZtSSP40 | <i>Mycgr3G70376</i>  | 203                  | Hypothetical                                    | -                           | +                         |
| ZtSSP41 | <i>Mycgr3G95672</i>  | 142                  | Hypothetical                                    | +                           | +                         |
| ZtSSP42 | <i>Mycgr3G99124</i>  | 113                  | Hypothetical                                    | +                           | +                         |

|         |                      |     |                    |   |   |
|---------|----------------------|-----|--------------------|---|---|
| ZtSSP43 | <i>Mycgr3G79783</i>  | 184 | Hypothetical       | - | + |
| ZtSSP44 | <i>Mycgr3G99676</i>  | 168 | Hypothetical       | - | + |
| ZtSSP45 | <i>Mycgr3G83081</i>  | 53  | Hypothetical       | + | + |
| ZtSSP46 | <i>Mycgr3G82925</i>  | 57  | Hypothetical       | + | + |
| ZtSSP47 | <i>Mycgr3G81208</i>  | 59  | Hypothetical       | + | + |
| ZtSSP48 | <i>Mycgr3G79286</i>  | 63  | Hypothetical       | + | + |
| ZtSSP49 | <i>Mycgr3G79161</i>  | 68  | Hypothetical       | + | + |
| ZtSSP50 | <i>Mycgr3G78893</i>  | 204 | Hypothetical       | - | + |
| ZtSSP51 | <i>Mycgr3G106125</i> | 70  | Hypothetical       | + | + |
| ZtSSP52 | <i>Mycgr3G104383</i> | 74  | Hypothetical       | + | + |
| ZtSSP53 | <i>Mycgr3G83064</i>  | 75  | Hypothetical       | + | + |
| ZtSSP54 | <i>Mycgr3G108329</i> | 192 | Hypothetical       | + | - |
| ZtSSP55 | <i>Mycgr3G67799</i>  | 273 | Zinc peptidase     | - | + |
| ZtSSP56 | <i>Mycgr3G103792</i> | 197 | PAN domain         | + | + |
| ZtSSP57 | <i>Mycgr3G63409</i>  | 253 | PEBP domain        | - | + |
| ZtSSP58 | <i>Mycgr3G67060</i>  | 267 | Peroxidase_2       | - | - |
| ZtSSP59 | <i>Mycgr3G104571</i> | 230 | PEBP domain        | - | - |
| ZtSSP60 | <i>Mycgr3G105030</i> | 269 | Peptidase_A4       | - | + |
| ZtSSP61 | <i>Mycgr3G81448</i>  | 97  | COesterase         | - | + |
| ZtSSP62 | <i>Mycgr3G105871</i> | 246 | Glyco_hydro_12     | + | + |
| ZtSSP63 | <i>Mycgr3G107289</i> | 247 | DUF3238            | - | - |
| ZtSSP64 | <i>Mycgr3G105487</i> | 97  | LysM               | + | + |
| ZtSSP65 | <i>Mycgr3G111027</i> | 151 | Alt_A1 superfamily | + | - |
| ZtSSP66 | <i>Mycgr3G111636</i> | 159 | Hce2               | + | + |
| ZtSSP67 | <i>Mycgr3G109710</i> | 200 | Cap superfamily    | + | + |
| ZtSSP68 | <i>Mycgr3G99331</i>  | 224 | Cutinase           | - | + |
| ZtSSP69 | <i>Mycgr3G100955</i> | 254 | UreF superfamily   | - | - |
| ZtSSP70 | <i>Mycgr3G102956</i> | 258 | Sod_Cu             | - | + |
| ZtSSP71 | <i>Mycgr3G74453</i>  | 296 | LamG superfamily   | - | + |
| ZtSSP72 | <i>Mycgr3G93903</i>  | 297 | Glyco_hydro_cc     | - | + |
| ZtSSP73 | <i>Mycgr3G106335</i> | 238 | CHRD domain        | - | + |
| ZtSSP74 | <i>Mycgr3G107904</i> | 170 | Hce2               | + | + |
| ZtSSP75 | <i>Mycgr3G108976</i> | 200 | NADHdh             | - | + |
| ZtSSP76 | <i>Mycgr3G68483</i>  | 216 | Cutinase           | - | + |
| ZtSSP77 | <i>Mycgr3G77282</i>  | 231 | Cutinase           | + | + |
| ZtSSP78 | <i>Mycgr3G71724</i>  | 273 | Glyco_hydro_114    | - | - |
| ZtSSP79 | <i>Mycgr3G103393</i> | 284 | CAP_euk            | - | + |
| ZtSSP80 | <i>Mycgr3G102849</i> | 285 | GH64-TLP-SF        | - | + |
| ZtSSP81 | <i>Mycgr3G76021</i>  | 279 | ZnMc               | - | - |
| ZtSSP82 | <i>Mycgr3G48129</i>  | 96  | Hydrophobin_2      | + | + |
| ZtSSP83 | <i>Mycgr3G43394</i>  | 232 | Cutinase           | - | + |
| ZtSSP84 | <i>Mycgr3G98580</i>  | 270 | CFEM               | - | + |
| ZtSSP85 | <i>Mycgr3G111221</i> | 232 | PRK06347           | - | + |
| ZtSSP86 | <i>Mycgr3G110386</i> | 194 | LysM               | - | + |
| ZtSSP87 | <i>Mycgr3G76589</i>  | 240 | Glyco_hydro_45     | + | + |



**Table S4.** List of Primer used in this study.

| Primer                   | Primer Sequence (5' - 3')                                            | Purpose            | Source                       |
|--------------------------|----------------------------------------------------------------------|--------------------|------------------------------|
| ΔSP105265 F              | GGGGACAAGTTTGTACAAAAAAGCAGGCTTCATGCAAACTACTCC<br>GTCGGC              | Cloning            | This study                   |
| 105265 F                 | GGGGACAAGTTTGTACAAAAAAGCAGGCTTCATGCGTTCTTCATC<br>GTTGT               | Cloning            | This study                   |
| 105265R                  | GGGGACCACTTTGTACAAGAAAGCTGGGTGCAGAGCCAAGCCGA<br>AAATGG               | Cloning            | This study                   |
| UBQ F                    | GGGG ACA AGT TTG TAC AAA AAA GCA GGC TTC<br>ATGGCTGCTCATCCTGTTGAAT   | Cloning            | This study                   |
| UBQ R                    | GGGG AC CAC TTT GTA CAA GAA AGC TGG GTG<br>TTACAGCTGTGATTGATGTCATTTT | Cloning            | This study                   |
| UBQ <sup>126-219</sup> F | GGGGACAAGTTTGTACAAAAAAGCAGGCTTCATGCCGCATTCTCC<br>ATTATTTGA           | Cloning            | This study                   |
| UBQ <sup>126-219</sup> R | GGGGACCACTTTGTACAAGAAAGCTGGGTGTTAGTGATCGGCATA<br>AGCTTG              | Cloning            | This study                   |
| 105265F                  | TCACCGACTACACCGAGATG                                                 | qRT-PCR            | This study                   |
| 105265R                  | CGTGGAGGAGGAAGGAGAAG                                                 | qRT-PCR            | This study                   |
| Mg Tub F                 | ATCTACCGCGAAAGGTGTCCA                                                | qRT-PCR            | Rudd <i>et al.</i> , 2015    |
| Mg Tub R                 | TGGTCGCCGACACGCTTAAAGAG                                              | qRT-PCR            | Rudd <i>et al.</i> , 2015    |
| 35s F (CD3-687)          | CCTTCGCAAGACCCTTCCTC                                                 | Cloning            | This study                   |
| OCS R (CD3-687)          | GACATGTTGTGCGAAAATTCGCC                                              | Cloning            | This study                   |
| UBQV1F                   | CGATTAATTAATAATGAGCTTTCGTGAAGATCT                                    | VIGS               | This study                   |
| UBQV1R                   | CGACCCGGGGGGGCATAGTGCGTTTATC                                         | VIGS               | This study                   |
| UBQV2F                   | CGATTAATTAACAACCGCCCAACAACCTG                                        | VIGS               | This study                   |
| UBQV2R                   | CGACCCGGGAGTCAAGGGCCATCCTGAA                                         | VIGS               | This study                   |
| QPCR F1                  | GCGGCCATTTGTGTTCTGTC                                                 | VIGS               | This study                   |
| QPCR R1                  | GCAACACAACCTACCGTATA                                                 | VIGS               | This study                   |
| TaCDC48F                 | AAATACGCCATCAGGGAGAACATCGAG                                          | qRT-PCR<br>HK VIGS | Lee <i>et al.</i> , 2014     |
| TaCDC48R                 | CTCGCTGCCGAAACCACGAGAC                                               | qRT-PCR<br>HK VIGS | Lee <i>et al.</i> , 2014     |
| TaelF4E F                | GATTGAGCCAAAATGGGAAGAC                                               | qRT-PCR<br>HK VIGS | Lee <i>et al.</i> , 2014     |
| TaelF4E R                | GCCAGCAAAGTATGCAACCA                                                 | qRT-PCR<br>HK VIGS | Lee <i>et al.</i> , 2014     |
| 38105 (Zt-6) F           | GGGGACAAGTTTGTACAAAAAAGCAGGCTTCATGCGTTTCTCCCTC<br>CTCTC              | Cloning            | Kettles <i>et al.</i> , 2017 |
| 38106 (Zt-6) R           | GGGGACCACTTTGTACAAGAAAGCTGGGTGACTAGCTTGTGCCCG<br>AACAC               | Cloning            | Kettles <i>et al.</i> , 2017 |
| RcSSP2 F                 | GGGGACAAGTTTGTACAAAAAAGCAGGCTTCATGCAGAACAACAAC<br>TGTCGAG            | Cloning            | This study                   |
| RcSSP2 R                 | GGGGACCACTTTGTACAAGAAAGCTGGGTGCTACAACGCCAGACC<br>GAAGAT              | Cloning            | This study                   |
| HvUBQF                   | GGGG ACA AGT TTG TAC AAA AAA GCA GGC<br>TTCATGGCTGCTCATCCTGTTGAAT    | Cloning            | This study                   |
| HvUBQR                   | GGGG AC CAC TTT GTA CAA GAA AGC TGG<br>GTGTTACAGCTGCGATTGATGTCATTTT  | Cloning            | This study                   |
| 111505 (Zt-10)F          | GGGGACAAGTTTGTACAAAAAAGCAGGCTTCCTCAGACGACCCAG<br>TCTGCAC             | Cloning            | This study                   |
| 111505 (Zt-10)R          | GGGGACCACTTTGTACAAGAAAGCTGGGTGCTAATAGGCCGCAGA<br>GTATC               | Cloning            | This study                   |

**Table S6.** List of wheat proteins identified as a potential interactor with *Z. tritici* candidate ZtSSP2. Sequences obtained from positive clones in yeast 2 hybrid assay was blasted against Ensemble wheat (TGACv1) dataset and corresponding full-length sequences were obtained.

| <b>BLAST against <i>T.aestivum</i> TGACv1</b> | <b>Best BLASTP match</b>                                                  | <b>AA Size</b> |
|-----------------------------------------------|---------------------------------------------------------------------------|----------------|
| TRIAE_CS42_1DS_TGACv1_082290_AA0264360.1      | E3 ubiquitin-protein ligase At1g12760-like (LOC109745851)                 | 420            |
| TRIAE_CS42_7DL_TGACv1_604456_AA1998280.4      | Endoplasmic homolog (LOC109732828)                                        | 634            |
| TRIAE_CS42_7AL_TGACv1_556087_AA1755000.3      |                                                                           |                |
| TRIAE_CS42_7BL_TGACv1_578233_AA1891510.4      |                                                                           |                |
| TRIAE_CS42_1BL_TGACv1_030593_AA0095040.1      | Heavy metal-associated isoprenylated plant protein 39-like (LOC109766401) | 224            |
| TRIAE_CS42_1AL_TGACv1_000743_AA0018220.1      |                                                                           |                |
| TRIAE_CS42_1BL_TGACv1_030333_AA0087160.1      | Endo-1,3;1,4-beta-D-glucanase-like (LOC109778325)                         | 240            |
| TRIAE_CS42_1DL_TGACv1_061296_AA0191610.1      |                                                                           |                |
| TRIAE_CS42_5DL_TGACv1_435835_AA1455370.1      | Ankyrin repeat domain-containing protein 2A-like (LOC109746370)           | 398            |
| TRIAE_CS42_5BL_TGACv1_406247_AA1342930.1      |                                                                           |                |
